# Supplementary material for: Tracing the development and lifespan change of population-level structural asymmetry in the cerebral cortex
Source: eLife. 2023 Jun 19;12:e84685. doi: 10.7554/eLife.84685 (PMC10368427; doi:10.7554/eLife.84685)
Supplement: Supplementary file 1. — (A) Demographics of the samples used for each analysis. The number of unique participants (N unique), total observations (N obs), and number of scans constituting longitudinal observations (N longitudinal) is shown. Note that only the LCBC sample included longitudinal data (70% longitudinal coverage). * See Supplementary file 1C for further details of the HCP extended twin design used for heritability analysis. ** For analyses of SNP-heritability and *** associations with individual differences, to maximize power to detect effects subsets based on maximum data availability were taken from the N=38,171 UK Biobank base sample described here (i.e., all individuals with genotype data surpassing quality control; all individuals with available cognitive/handedness data; see Methods). (B) MRI acquisition parameters by sample. TR = Repetition time; TE = Echo time; TI = Inversion time; FA = Flip angle; FOV = Field of view; 3D MPRAGE = three-dimensional magnetization prepared rapid gradient echo. * see available IXI imaging parameters here. **See UK Biobank brain imaging documentation here. (-) Not available/ found. (C) Kinships of the extended twin design used for heritability analysis (HCP data). The number of observations of each pedigree type is given as well as the overall number of subjects per pedigree-type (N; Total N=1037). As no pedigree-type contained more than a single twin-pair, the number of monozygotic (MZ) and dizygotic (DZ) twin-pairs is reported per type. As all twins were same-sex, the ratio of female/male twin pairs is given per type. (D) Linear regression results of the main effect of Cluster Type (i.e. Desikan-Killiany [DK] parcels v robust asymmetry clusters) upon the average correlation across vertex-mean correlations within parcels/clusters, controlling for cluster size (nVertices) and the Cluster Type × nVertices interaction. Average vertex-mean correlations were significantly higher for robust asymmetry clusters for areal asymmetry, and were signifi [file elife-84685-supp1.xlsx]

## Sheet: 1A-samples
Sample (country)	Analysis	N unique	N obs (N longitudinal)	Mean follow-up interval (Range)	Age-range	Mean Age (SD)	Sex (F/M)
LCBC (Norway)	Reproducibility / Interrelationships	923	1572 (812)	2.7 (0.1-9.4)	18.0 - 55.0	30.6 (9.6)	622 / 301
	Lifespan trajectories	1886	3937 (2762)	2.7 (0.1-11)	4.1 - 89.4	36.8 (25.4)	1139 / 747
	Interregional correlations	1263	2817 (586)	2.8 (0.1-11)	18.0 - 89.4	48.2 (21.5)	821 / 442
Cam-CAN (UK)	Reproducibility	321	321	-	18.5 - 54.9	38.7 (9.7)	171 / 150
DLBS (USA)	Reproducibility	160	160	-	20.6 - 54.9	37.5 (10.7)	98 / 62
SALD (China)	Reproducibility	301	301	-	19 - 54	33.7 (11.5)	191 / 110
IXI (UK)	Reproducibility	313	313	-	20.0 - 54.7	36.8 (9.6)	162 / 151
HCP (USA)	Reproducibility / Interregional correlations	1111	1111	-	22 - 37	28.8 (3.7)	605 / 506
	Heritability*	1037	1037	-	22 - 37	28.9 (3.7)	570 / 467
UK Biobank (UK)	Reproducibility	1000	1000	-	46.1 - 55.0	52.1 (1.9)	581 / 419
	Interregional correlations / Heritability** / Individual differences***	38171	38171	-	44.6 - 82.3	64.1 (7.6)	20138/18033
Supplementary file 1A. Demographics of the samples used for each analysis. The number of unique participants (N unique), total observations (N obs), and number of scans constituting longitudinal observations (N longitudinal) is shown. Note that only the LCBC sample included longitudinal data (70% longitudinal coverage). * See SI Table 1C for further details of the HCP extended twin design used fo…

## Sheet: 1B-scanners
Sample	Scanner	Sequence	Tesla	Slices	Voxel size (mm)	Time parameters	Other parameters	Notes
LCBC	Avanto (Siemens)	3D MP-RAGE	1.5	160	1.25×1.25×1.25	TR/TE/TI=2400ms/3.61ms/1000ms	FA/FOV = 8°/240×240mm
	Skyra (Siemens)	3D MP-RAGE	3	176	1×1×1	TR/TE/TI=2300ms/2.98ms/850ms	FA/FOV = 8°/256×256mm
	Prisma (Siemens)	3D MP-RAGE	3	208	1×1×1	TR/TE/TI=2400ms/2.22ms/1000ms	FA/FOV = 8°/240×256mm
	Avanto (Siemens)	3D MP-RAGE	1.5	160	1.25×1.25×1.25	TR/TE/TI=2400ms/3.79ms/1000ms	FA/FOV = 8°/240×240mm	Included in lifespan analysis only
Cam-CAN	Tim Trio (Siemens)	3D MP-RAGE	3	192	1×1×1	TR/TE/TI=2250ms/2.98ms/900ms	FA/FOV = 9°/256×240mm
SALD	Trio (Siemens)	3D MP-RAGE	3	176	1×1×1	TR/TE/TI=1900ms/2.52ms/900ms	FA/FOV = 90°/256×256mm
DLBS	Achieva (Philips)	3D MP-RAGE	3	160	1×1×1	TR/TE/TI=2300ms/8.13ms/1100ms	FA/FOV = 12°/204×256mm
IXI (Hammersmith)*	Intera (Philips)	-	3	150	0.9×0.9×1.2	TR/TE/TI=9600ms/4.60ms/-	FA/FOV = 8°/208×208mm
IXI (Guys)*	Gyroscan Intera (Philips)	-	1.5	150	0.9×0.9×1.2	TR/TE/TI=9813ms/4.60ms/-	FA/FOV = 8°/-
IXI (IoP)*	GE	-	1.5	146	0.9×0.9×1.2	-	-
UK Biobank**	Skyra (Siemens)	3D MP-RAGE	3	256	1×1×1	TR/TE/TI=2000ms/-/880ms	FA/FOV = -/256×256mm
HCP	Magnetom (Siemens)	3D MP-RAGE	3	256	0.7×0.7×0.7	TR/TE/TI=2400ms/2.14ms/1000ms	FA/FOV = 8°/-
* see available IXI imaging parameters here (https://brain-development.org/ixi-dataset)
**see brain imaging documentation here https://biobank.ctsu.ox.ac.uk/crystal/crystal/docs/brain_mri.pdf
- Not available
Supplementary file 1B. MRI acquisition parameters by sample. TR =Repetition time; TE= Echo time; TI = Inversion time; FA = Flip angle; FOV = Field of view; 3D MPRAGE = three-dimensional magnetization prepared rapid gradient echo. * see available IXI imaging parameters here (https://brain-development.org/ixi-dataset). **See UK Biobank brain imaging documentation here https://biobank.ctsu.ox.ac.uk/…

## Sheet: 1C-pedigrees
Pedigree	Observations	MZ	DZ	Same-sex Twin-pair Ratio (F/M)	Mean Age	N
Twin pair	55	37	18	33/22	29.8	110
Twin pair + 1 siblings	143	93	50	91/52	29.3	429
Twin pair + 2 siblings	34	18	16	17/17	29	136
Twin pair + 3 siblings	1	0	1	1/0	31.5	5
Twin pair + 4 siblings	1	0	1	1/0	28	6
2 Siblings	97	-	-	-	28	194
3 Siblings	33	-	-	-	28.3	99
4 siblings	12	-	-	-	26.8	48
5 siblings	2	-	-	-	29.3	10
					28.9	N = 1037
Supplementary file 1C. Kinships of the extended twin design used for heritability analysis (HCP data). The number of observations of each pedigree type is given as well as the overall number of subjects per pedigree-type (N; Total N = 1037). As no pedigree-type contained more than a single twin-pair, the number of monozygotic (MZ) and dizygotic (DZ) twin-pairs is reported per type. As all twins w…

## Sheet: 1D-vertex_v_Desikan
			ClusterType			nVertices			ClusterType*nVertices			Model
Dataset	Metric		Standardized β	p		Standardized β	p		Standardized β	p		r2 (adjusted)	df
LCBC (18-55 years)	area		0.62	0.028		-0.00021	3.63e-08	-6.58e-05	-6.58e-05	0.27	44	0.65	44
UKB (N=1000)			0.62	0.027		-0.000212	3e-08	-5.52e-05	-5.52e-05	0.35	44	0.65	44
HCP			0.52	0.05		-0.000226	1.78e-09	-4.73e-05	-4.73e-05	0.4	44	0.69	44
LCBC (18-55 years)	thickness		0.48	0.047		-0.000235	2.27e-10	-0.000118	-0.000118	0.1	50	0.69	50
UKB (N=1000)			0.44	0.085		-0.000233	1.2e-09	-0.000122	-0.000122	0.11	50	0.66	50
HCP			0.49	0.048		-0.000232	4.96e-10	-0.000149	-0.000149	0.04	50	0.68	50
Supplementary file 1D. Linear regression results of the main effect of Cluster Type (i.e. Desikan-Killiany [DK] parcels v robust asymmetry clusters) upon the average correlation across vertex-mean correlations within parcels/clusters, controlling for cluster size (nVertices) and the Cluster Type × nVertices interaction. Average vertex-mean correlations were significantly higher for robust asymmet…

## Sheet: 1E-lifespan (area)
									Fixed effect covariates
			s(LH-Age)-s(RH-Age)						Hemisphere			Sex			Model
Direction	ROI #	Cluster		edf	F	p	Ω2		β	p		β	i		r2 adjusted	N obs	Outliers excluded
Leftward	1	L_Postcentral-gyrus_Supramarginal		3.1	33.9	0	0.013		0.06	0	0.05	0.05	0.0506		0.393	7874	0
	2	L_Anterior-temporal_Parahippocampal-gyrus		4.3	11.7	0	0.006		0.04	0	0.05	0.05	0.0505		0.341	7870	2
	3	L_Anterior-cingulate_Subcalloareall		4.6	17.9	0	0.01		0.04	3.05e-94	0.07	0.07	0.073		0.105	7874	0
	4	L_Anterior-insula		1.8	18.8	1.8e-06	0.004		0.04	0	0.03	0.03	0.0336		0.245	7870	2
	5	L_Retrosplenial-cortex		4.3	25	0	0.013		0.04	0	0.05	0.05	0.0494		0.189	7872	1
	6	L_Temporal-pole_Inferior-temporal-gyrus		1	14.8	0.000121	0.002		0.06	0	0.07	0.07	0.0657		0.21	7868	3
	7	L_Superior-frontal-gyrus		4.6	8.2	2.62e-07	0.004		0.03	6.84e-86	0.07	0.07	0.0731		0.155	7874	0
Rightward	1	R_Parieto-occipital_sulcus		2.3	21.4	0	0.006		-0.06	0	0.07	0.07	0.0714		0.268	7868	3
	2	R_Inferior-parietal_Lateral-occipital		4.2	12.7	0	0.006		-0.08	0	0.08	0.08	0.0767		0.291	7874	0
	3	R_Cingulate		3.9	5.5	0.000143	0.002		-0.05	0	0.03	0.03	0.0348		0.189	7874	0
	4	R_Middle-frontal-gyrus		4.8	6.7	3.59e-06	0.003		-0.05	6.49e-200	0.1	0.1	0.104		0.283	7874	0
	5	R_Superior-temporal-sulcus		1	3.3	0.071	0		-0.04	0	0.05	0.05	0.0492		0.273	7872	1
	6	R_Superior-frontal-gyrus		4.5	3.9	0.00127	0.002		-0.05	0	0.09	0.09	0.0882		0.299	7874	0
	7	R_Gyrus-rectus		4.4	1.5	0.112	0		-0.07	0	0.05	0.05	0.0528		0.297	7874	0
Average Leftward				3.8	14	0	0.006		0.05	0	0.05	0.05	0.0509		0.423	7872	1
Average Rightward				3	28.8	0	0.01		-0.06	0	0.07	0.07	0.0688		0.424	7862	6
Supplementary file 1E. GAMM lifespan results for age-related change in areal asymmetry in robust asymmetry clusters (population-level areal asymmetries). A smooth Age × Hemisphere interaction [s(LH-Age)-s(RH-Age)] was modelled to determine whether asymmetry exhibited significant change across the lifespan. Significance of the smooth interaction (Bonferroni corrected; α < .05/14 = .0036) is in bol…

## Sheet: 1F-lifespan (thick)
									Fixed effect covariates
			s(LH-Age)-s(RH-Age)						Hemisphere			Sex			Model
Direction	ROI #	Cluster		edf	F	p	Ω2		β	p		β	p		r2 adjusted	N obs	Outliers excluded
Leftward	1	L_Cingulate		4	5.6	0.000171	0.002		0.19	0		0.03	0.0283		0.441	7874	0
	2	L_Superior-frontal-gyrus		4	15.7	0	0.007		0.07	2.06e-286		-0.02	-0.0161		0.796	7866	4
	3	L_Postcentral		4.6	14.7	0	0.008		0.04	6.28e-100		-0.04	-0.0392		0.593	7866	4
	4	L_Precentral		4.1	13.4	0	0.006		0.06	1.16e-182		-0.02	-0.0221		0.523	7872	1
	5	L_Supplementary-motor-cortex		1	13.5	0.000237	0.002		0.09	2.62e-197		-0.05	-0.0481		0.269	7872	1
	6	L_Collateral-sulcus		4.5	12.5	0	0.007		0.06	4.73e-130		-0.02	-0.0153		0.382	7862	6
	7	L_Anterior-transverse-collateral-sulcus		1	8.8	0.0031	0.001		0.04	1.91e-38		0.02	0.0187		0.191	7866	4
	8	L_Caudal-middle-frontal		3.6	9.2	4.42e-06	0.004		0.02	3.07e-23		-0.02	-0.0165		0.683	7866	4
	9	L_Caudal-superior-frontal		2.1	9.1	9.61e-05	0.002		0.07	4.67e-89		-0.04	-0.0387		0.422	7874	0
	10	L_Rostral-superior-frontal		3.8	29.2	0	0.013		0.07	1.46e-108		0	-0.00434		0.651	7868	3
	11	L_Calcarine-sulcus		3.8	7.2	1.53e-05	0.003		0.06	3.17e-130		0.06	0.0585		0.584	7862	6
Rightward	1	R_Superior-temporal-sulcus		3.5	41.6	0	0.018		-0.11	0		-0.01	-0.00884		0.728	7866	4
	2	R_Lateral-occipital		2.3	8	0.000252	0.002		-0.06	0		-0.01	-0.0146		0.539	7870	2
	3	R_Lingual-gyrus		1	26.7	3.3e-07	0.003		-0.11	0		0.01	0.0145		0.511	7866	4
	4	R_Posterior-insula_Sylvian		1	28.6	0	0.003		-0.1	0		-0.01	-0.00712		0.678	7870	2
	5	R_Entorhinal		3.8	6.8	0.000143	0.003		-0.18	0		0	-0.00132		0.238	7856	9
	6	R_Superior-insula		1	4.7	0.0295	0		-0.05	4.43e-117		0.02	0.0159		0.606	7862	6
	7	R_Planum-temporale		4.7	26	0	0.015		-0.08	2.12e-209		-0.03	-0.0315		0.588	7864	5
	8	R_Posterior-cingulate		4.9	11.8	0	0.007		-0.05	2.78e-135		-0.01	-0.00956		0.623	7862	6
	9	R_Anterior-insula		4	12.6	0	0.006		-0.07	3.4e-161		0.01	0.0096		0.522	7872	1
Average leftward		M1		3.9	4.9	0.000456	0.002	0.09	0.09	0	-0.00601	-0.01	-0.00601	2	0.778	7870	2
Average rightward		M2		3.9	33.5	0	0.016	-0.09	-0.09	0	-0.00696	-0.01	-0.00696	6	0.747	7862	6
Supplementary file 1F. GAMM lifespan results for age-related change in thickness asymmetry in robust asymmetry clusters (population-level thickness asymmetries). A smooth Age × Hemisphere interaction [s(LH-Age)-s(RH-Age)] was modelled to determine whether asymmetry exhibited significant change across the lifespan. Significance of the smooth interaction (Bonferroni corrected; α < .05/20 = .0025) i…

## Sheet: 1G-heritability (global)
	HCP (extended twin)								UK Biobank (SNP-based)
Global Metric	h2 [± 95% CI]	p	e2	-2LL AE	-2LL E	rMZ	rDZsibPairs		h2 [± 95% CI]	p
lh.area	0.922 (0.9 - 0.939)	5.04671e-103	0.076	2476.4	2940.9	0.912	0.558		0.672 (0.636-0.707)	0
rh.area	0.926 (0.905 - 0.941)	1.22227e-103	0.073	2473.5	2940.9	0.916	0.547		0.676 (0.641-0.711)	0
AI.area	0.161 (0.051 - 0.276)	0.00351938	0.85	2932.4	2940.9	0.125	0.036		0.065 (0.028-0.101)	0.00021619
lh.thickness	0.807 (0.755 - 0.847)	1.48216e-61	0.194	2666.8	2940.9	0.806	0.458		0.348 (0.31-0.386)	0
rh.thickness	0.816 (0.766 - 0.855)	1.82538e-62	0.185	2662.6	2940.9	0.815	0.456		0.374 (0.336-0.412)	0
AI.thickness	0.162 (0.053 - 0.272)	0.00303642	0.865	2932.1	2940.9	0.13	0.072		0.014 (-0.021-0.049)	0.21664
Supplementary file 1G. Heritability of global brain measures. Significant twin-based (HCP) and SNP-based (UK Biobank; N = 31,433) heritability (h2) estimates are shown in bold, Bonferroni-corrected (p < 8.3e-3 [.05/6]) separately for twin- and SNP-based estimates. Significant and high heritability estimates were observed for global brain measures of each hemisphere separately. For global asymmetr…

## Sheet: 1H-heritability (area)
				HCP (extended twin)								UK Biobank (SNP-based)
Direction	ROI #	Cluster		h2 [± 95% CI]	p	e2	-2LL AE	-2LL E	rMZ	rDZsibPairs		h2 [± 95% CI]	p		p < 05 [uncorrected; genetic correlation tested]
Leftward	1	L_Postcentral-gyrus_Supramarginal		0.26 (0.148 - 0.37)	2.4298e-06	0.744	2918.7	2940.9	0.254	0.105		0.107 (0.07-0.144)	3.0066e-09		yes
	2	L_Anterior-temporal_Parahippocampal-gyrus		0.044 (0 - 0.151)	0.403776	0.952	2940.2	2940.9	-0.078	0.061		0.063 (0.026-0.10)	0.00044695		yes
	3	L_Anterior-cingulate_Subcallosal		0.096 (0 - 0.205)	0.0717058	0.91	2937.6	2940.9	0.082	0.018		0.048 (0.012-0.085)	0.0044634		yes
	4	L_Anterior-insula		0.207 (0.101 - 0.314)	7.12423e-05	0.793	2925.1	2940.9	0.228	0.073		1 0.186 (0.149-0.224)	0		yes
	5	L_Retrosplenial-cortex		0 (0 - 0.101)	1	0.99	2940.9	2940.9	-0.054	-0.003		0.093 (0.056-0.13)	2.5702e-07		yes
	6	L_Temporal-pole_Inferior-temporal-gyrus		0.126 (0.015 - 0.243)	0.0248431	0.874	2935.8	2940.9	0.253	0.042		0.032 (-0.004-0.067)	0.03772		yes
	7	L_Superior-frontal-gyrus		0.101 (0 - 0.214)	0.0699648	0.913	2937.6	2940.9	0.08	0.031		0.029 (-0.006-0.065)	0.053729		yes
Rightward	1	R_Parieto-occipital_sulcus		0.058 (0 - 0.171)	0.291198	0.962	2939.8	2940.9	0.022	0.039		0.06 (0.072-0.142)	0.00016269		yes
	2	R_Inferior-parietal_Lateral-occipital		0.033 (0 - 0.143)	0.535889	0.973	2940.5	2940.9	0.028	0.04		0.059 (0.027-0.099)	0.00046068		yes
	3	R_Cingulate		0.192 (0.077 - 0.309)	0.000847873	0.808	2929.7	2940.9	0.317	0.005		0.083 (0.011-0.086)	5.5574e-06		yes
	4	R_Middle-frontal-gyrus		0.024 (0 - 0.139)	0.66235	0.976	2940.7	2940.9	0.128	-0.006		0.021 (0.151-0.222)	0.12357
	5	R_Superior-temporal-sulcus		0.267 (0.154 - 0.379)	2.40078e-06	0.733	2918.6	2940.9	0.283	0.121		0.078 (0.057-0.13)	1.0199e-05		yes
	6	R_Superior-frontal-gyrus		0.009 (0 - 0.119)	0.866671	0.991	2940.8	2940.9	-0.02	-0.018		0.042 (-0.003-0.067)	0.0078143		yes
	7	R_Gyrus-rectus		0.021 (0 - 0.133)	0.698238	0.986	2940.7	2940.9	0.028	0.083		0.088 (-0.007-0.066)	2.0851e-07		yes
											1 Highest SNP-heritability was observed for leftward asymmetry in anterior insula
											Note that because the p-value was lower than the minimum in GCTA (p = 0) we report p < 1.78e-15 as this was the lowest numeric p-value in cortex-wide analyses
Supplementary file 1H. Heritability of areal asymmetry in robust asymmetry clusters (population-level areal asymmetries). Significant twin-based (HCP) and SNP-based (UK Biobank; N = 31,433) heritability (a2 / h2) estimates are shown in bold, Bonferroni-corrected (p < 3.6e-3 [.05/14]) separately for twin- and SNP-based estimates. 1Note the highest SNP-heritability was observed for areal asymmetry …

## Sheet: 1I-heritability (thick)
				HCP (extended twin)								UK Biobank (SNP-based)
Direction	ROI #	Cluster		h2 [± 95% CI]	p	e2	-2LL AE	-2LL E	rMZ	rDZsibPairs		h2 [± 95% CI]	p		p < 05 [uncorrected; genetic correlation tested]
Leftward	1	L_Cingulate		0.134 (0.028 - 0.245)	0.0120144	0.866	2934.6	2940.9	0.182	0.01		0.068 (0.032-0.105)	6.8931e-05		yes
	2	L_Superior-frontal-gyrus		0.083 (0 - 0.194)	0.130355	0.943	2938.6	2940.9	0.01	0.013		0.009 (-0.025-0.044)	0.29134
	3	L_Postcentral		0.076 (0 - 0.192)	0.179624	0.924	2939.1	2940.9	0.215	-0.03		0.024 (-0.012-0.06)	0.098809
	4	L_Precentral		0 (0 - 0.086)	1	0.99	2940.9	2940.9	-0.142	-0.025		0.008 (-0.026-0.043)	0.31902
	5	L_Supplementary-motor-cortex		0.08 (0 - 0.189)	0.133661	0.92	2938.6	2940.9	0.084	-0.013		0.012 (-0.023-0.047)	0.25853
	6	L_Collateral-sulcus		0.083 (0 - 0.191)	0.118167	0.947	2938.4	2940.9	0.055	0.028		0.034 (-0.002-0.07)	0.033831		yes
	7	L_Anterior-transverse-collateral-sulcus		0.095 (0 - 0.211)	0.0953918	0.905	2938.1	2940.9	0.106	0.102		0.049 (0.013-0.086)	0.0043824		yes
	8	L_Caudal-middle-frontal		0.057 (0 - 0.167)	0.290023	0.963	2939.8	2940.9	0.025	0.079		0.011 (-0.023-0.046)	0.25502
	9	L_Caudal-superior-frontal		0.036 (0 - 0.145)	0.495154	0.964	2940.4	2940.9	0.074	0.009		0.024 (-0.011-0.059)	0.081585
	10	L_Rostral-superior-frontal		0.01 (0 - 0.118)	0.858561	0.985	2940.8	2940.9	-0.061	0.022		0 (-0.033-0.033)	0.5
	11	L_Calcarine-sulcus		0.09 (0 - 0.198)	0.084232	0.91	2937.9	2940.9	0.116	0.055		0.039 (0.003-0.075)	0.00039545		yes
Rightward	1	R_Superior-temporal-sulcus		0.201 (0.09 - 0.313)	0.000295332	0.8	2927.8	2940.9	0.191	0.09		0.051 (0.015-0.087)	0.014123		yes
	2	R_Lateral-occipital		0.083 (0 - 0.19)	0.111511	0.938	2938.3	2940.9	-0.011	0.017		0.019 (-0.015-0.053)	0.0026736		yes
	3	R_Lingual-gyrus		0.213 (0.104 - 0.324)	8.46674e-05	0.787	2925.4	2940.9	0.293	0.062		0.059 (0.024-0.094)	0.12994
	4	R_Posterior-insula_Sylvian		0.149 (0.039 - 0.262)	0.00697837	0.875	2933.6	2940.9	0.127	0.074		0.033 (-0.001-0.068)	0.00020153		yes
	5	R_Entorhinal		0.031 (0 - 0.138)	0.545539	0.969	2940.5	2940.9	0.05	-0.005		0.034 (-0.001-0.069)	0.019931		yes
	6	R_Superior-insula		0.03 (0 - 0.135)	0.555719	0.97	2940.5	2940.9	-0.054	-0.005		0.036 (0-0.071)	0.024971		yes
	7	R_Planum-temporale		0.035 (0 - 0.145)	0.512478	0.965	2940.4	2940.9	0.06	-0.091		0 (-0.034-0.034)	0.023767		yes
	8	R_Posterior-cingulate		0.046 (0 - 0.148)	0.354666	0.971	2940	2940.9	0.033	-0.064		0.042 (0.007-0.078)	0.5
	9	R_Anterior-insula		0 (0 - 0.09)	1	1	2940.9	2940.9	0.071	-0.121		0.068 (0.032-0.105)	0.0089533		yes
Supplementary file 1I. Heritability of thickness asymmetry in robust asymmetry clusters (population-level thickness asymmetries). Significant twin-based (HCP) and SNP-based (UK Biobank; N = 31,433) heritability (h2) estimates are shown in bold, Bonferroni-corrected (p < 2.5e-3 [.05/20]) separately for twin- and SNP-based estimates. e2 = unique environmental effects + error; -2LL = minus 2 log lik…

## Sheet: 1J-ind_diffs (area)
				Cognition			Handedness			Sex			ICV			Model with extra covariates to control for brain size as recommended by Williams et al. (2022; L+R, TCM, L-R TCM)
Direction	ROI #	Cluster		Standardized β	p		Standardized β	p		Standardized β	p		Standardized β	p		Cognition p	Handedness p	Sex p
Leftward	1	L_Postcentral-gyrus_Supramarginal		0.029	7.39e-07		-0.028	0.109		0.189	2.8e-50		0.017	0.00809		9.9e-07	0.323	2.29e-54
	2	L_Anterior-temporal_Parahippocampal-gyrus		-0.014	0.0175		-0.049	0.00519		0.199	2.34e-55		-0.014	0.0292		0.0643	0.0246	2.11e-49
	3	L_Anterior-cingulate_Subcallosal		-0.011	0.0559		0.026	0.135		-0.168	2.74e-40		0.085	9.55e-42		0.0224	0.201	1.15e-36
	4	L_Anterior-insula		0.014	0.0133		-0.115	6.46e-11		0.005	0.69		0.027	1.68e-05		0.0211	9.35e-10	0.403
	5	L_Retrosplenial-cortex		0.009	0.126		-0.024	0.167		0.09	1.71e-12		-0.049	7.66e-15		0.187	0.268	2.49e-21
	6	L_Temporal-pole_Inferior-temporal-gyrus		0.011	0.0556		0.012	0.493		-0.009	0.476		-0.027	2.66e-05		0.0459	0.198	0.299
	7	L_Superior-frontal-gyrus		0.006	0.3		-0.017	0.325		0.066	2.14e-07		-0.033	1.72e-07		0.268	0.49	7.97e-09
Rightward	1	R_Parieto-occipital_sulcus		0.009	0.123		0.013	0.454		0.022	0.077		0.046	2.79e-13		0.146	0.993	0.845
	2	R_Inferior-parietal_Lateral-occipital		0.012	0.0459		-0.021	0.241		0.134	4.72e-26		-0.02	0.00165		0.0567	0.0858	2.98e-20
	3	R_Cingulate		0.002	0.78		0.036	0.0433		0.042	0.00104		-0.059	1.55e-20		0.775	0.0361	0.000964
	4	R_Middle-frontal-gyrus		0.009	0.127		-0.019	0.287		0.062	1.23e-06		0.003	0.683		0.103	0.138	6.4e-05
	5	R_Superior-temporal-sulcus		-0.009	0.131		-0.018	0.31		0.01	0.412		0.004	0.556		0.135	0.321	0.0165
	6	R_Superior-frontal-gyrus		0.008	0.157		0.029	0.0971		-0.132	3.64e-25		0.057	2.58e-19		0.325	0.222	6.75e-33
	7	R_Gyrus-rectus		0.015	0.0104		0.018	0.303		-0.164	2.08e-38		-0.038	1.22e-09		0.00901	0.321	1.98e-32
Supplementary file 1J. Areal asymmetry associations. Results of linear regressions modelling the effects of individual differences (General Cognitive Ability, Handedness, Sex, and ICV) on asymmetry in population-level areal asymmetries in the full UK Biobank imaging sample with available cognitive data (imputed for no missing cognitive variables; N = 35,198) or available handedness data (Handedne…

[truncated: 3 more sheets: 1K-ind_diffs (thick), 1L-cognitive_weights, 1M-DATAACCESS]
